# Supplementary material
Source: Research Square preprint supplement (doi:10.21203/rs.3.rs-9083770/v1)
Supplement: Supplementary file 1 [file ec8bd3c4474bbe9fd1c86494.docx]

**Supplementary file-**

Table 1- **Health Related quality of life Scores Stratified by Work Profile**

| **Measure** | **Blue collar Mean (SD)** | **White collar Mean (SD)** |
| --- | --- | --- |
| Overall QoL | 4.43 (0.837) | 3.88 (0.677) |
| Health satisfaction | 4.52 (0.812) | 3.81 (0.783) |
| Physical health | 89.4 (13.9) | 73.6 (14.1) |
| Psychological health | 79.3 (16.8) | 68.1 (14.7) |
| Social health | 88.5 (15.8) | 80.9 (14.5) |
| Environmental health | 76.6 (14.7) | 65.9 (16.8) |

Table 2- **Hierarchical Linear regression model showing predictors of HRQoL; (physical health, psychological health, social health and environmental health)** model 1

| Predictor | Physical Health | | Psychological Health | | Social Health | | Environmental Health | |
| --- | --- | --- | --- | --- | --- | --- | --- | --- |
| **p** | **Standard Estimate** | **p** | **Standard Estimate** | **p** | **Standard Estimate** | **p** | **Standard Estimate** |
| Intercept ᵃ | < .001 |  | < .001 |  | < .001 |  | < .001 |  |
| age | 0.105 | -0.118 | 0.981 | 0.00175 | 0.318 | -0.0702 | 0.261 | -0.0809 |
| sex: |  |  |  |  |  |  |  |  |
| Male – Female | 0.035 | -0.786 | 0.852 | -0.06998 | 0.170 | -0.4950 | 0.288 | -0.3914 |
| education: |  |  |  |  |  |  |  |  |
| 10th pass : Matriculate – < 10th | 0.348 | -0.212 | 0.851 | 0.04276 | 0.915 | -0.0233 | 0.514 | 0.1461 |
| 12th pass : Intermediate – < 10th | 0.258 | -0.241 | 0.081 | -0.37499 | 0.272 | -0.2268 | 0.243 | -0.2466 |
| Graduate & above – < 10th | < .001 | -1.121 | < .001 | -0.98359 | < .001 | -0.6788 | < .001 | -0.9644 |
| Marital status: |  |  |  |  |  |  |  |  |
| Married – Single | 0.128 | 0.325 | 0.022 | 0.49428 | < .001 | 1.3594 | 0.005 | 0.6044 |

Table 3- **Hierarchical Linear regression model showing predictors of HRQoL; (physical health, psychological health, social health and environmental health)** model 2

| Predictor | Physical Health | | Psychological Health | | Social Health | | Environmental Health | |
| --- | --- | --- | --- | --- | --- | --- | --- | --- |
| **p** | **Standard Estimate** | **p** | **Standard Estimate** | **p** | **Standard Estimate** | **p** | **Standard Estimate** |
| Intercept ᵃ | < .001 |  | < .001 |  | < .001 |  | < .001 |  |
| age | 0.143 | -0.1290 | 0.224 | -0.1109 | 0.360 | -0.0802 | 0.048 | -0.1631 |
| sex: |  |  |  |  |  |  |  |  |
| Male – Female | 0.209 | -0.4631 | 0.358 | 0.3517 | 0.431 | -0.2894 | 0.629 | -0.1660 |
| education: |  |  |  |  |  |  |  |  |
| 10th pass : Matriculate – < 10th | 0.506 | -0.1447 | 0.873 | 0.0360 | 0.902 | -0.0268 | 0.862 | -0.0354 |
| 12th pass : Intermediate – < 10th | 0.469 | -0.1490 | 0.140 | -0.3157 | 0.338 | -0.1968 | 0.058 | -0.3653 |
| Graduate & above – < 10th | 0.002 | -0.6406 | 0.001 | -0.7055 | 0.018 | -0.4978 | < .001 | -0.6808 |
| Marital status: |  |  |  |  |  |  |  |  |
| Married – Single | 0.172 | 0.2909 | 0.014 | 0.5495 | < .001 | 1.3367 | < .001 | 0.8123 |
| work profile: |  |  |  |  |  |  |  |  |
| White collar – Blue collar worker | 0.039 | -0.3544 | 0.787 | -0.0480 | 0.560 | 0.0995 | 0.154 | -0.2281 |
| work experience: |  |  |  |  |  |  |  |  |
| 6 - 10 years – 1 - 5 years | 0.750 | 0.0565 | 0.617 | 0.0919 | 0.670 | 0.0753 | 0.124 | -0.2552 |
| 11 - 15 years – 1 - 5 years | 0.842 | 0.0415 | 0.749 | 0.0689 | 0.540 | 0.1269 | 0.195 | -0.2517 |
| 16-20 years – 1 - 5 years | 0.615 | 0.1162 | 0.930 | 0.0212 | 0.929 | -0.0206 | 0.480 | -0.1524 |
| >21 years – 1 - 5 years | 0.511 | 0.1673 | 0.050 | 0.5203 | 0.791 | 0.0672 | 0.926 | 0.0219 |
| daily working hours: |  |  |  |  |  |  |  |  |
| 4-6 hours – < 4 hours | 0.284 | -0.2177 | 0.132 | -0.3181 | 0.793 | -0.0530 | 0.007 | -0.5160 |
| > 6 hours – < 4 hours | 0.018 | 0.3585 | 0.051 | 0.3066 | 0.010 | 0.3890 | 0.814 | 0.0331 |
| break avail: |  |  |  |  |  |  |  |  |
| Yes – No | 0.140 | 0.2066 | 0.489 | 0.1002 | 0.123 | 0.2151 | 0.276 | 0.1419 |
| freedom at workplace: |  |  |  |  |  |  |  |  |
| Average – Low | 0.956 | 0.0102 | 0.368 | 0.1741 | 0.708 | -0.0696 | 0.038 | 0.3628 |
| High – Low | 0.085 | 0.3565 | 0.028 | 0.4724 | 0.142 | 0.3027 | < .001 | 0.6981 |
| income sufficiency: |  |  |  |  |  |  |  |  |
| Sufficient – Insufficient | 0.237 | -0.1774 | 0.799 | -0.0396 | 0.185 | -0.1983 | < .001 | 0.6630 |
